# Supplementary material
Source: publisher figshare collection journal article supplement (https://aacr.figshare.com/articles/dataset/_/22448438)

## Supplementary Figure 1

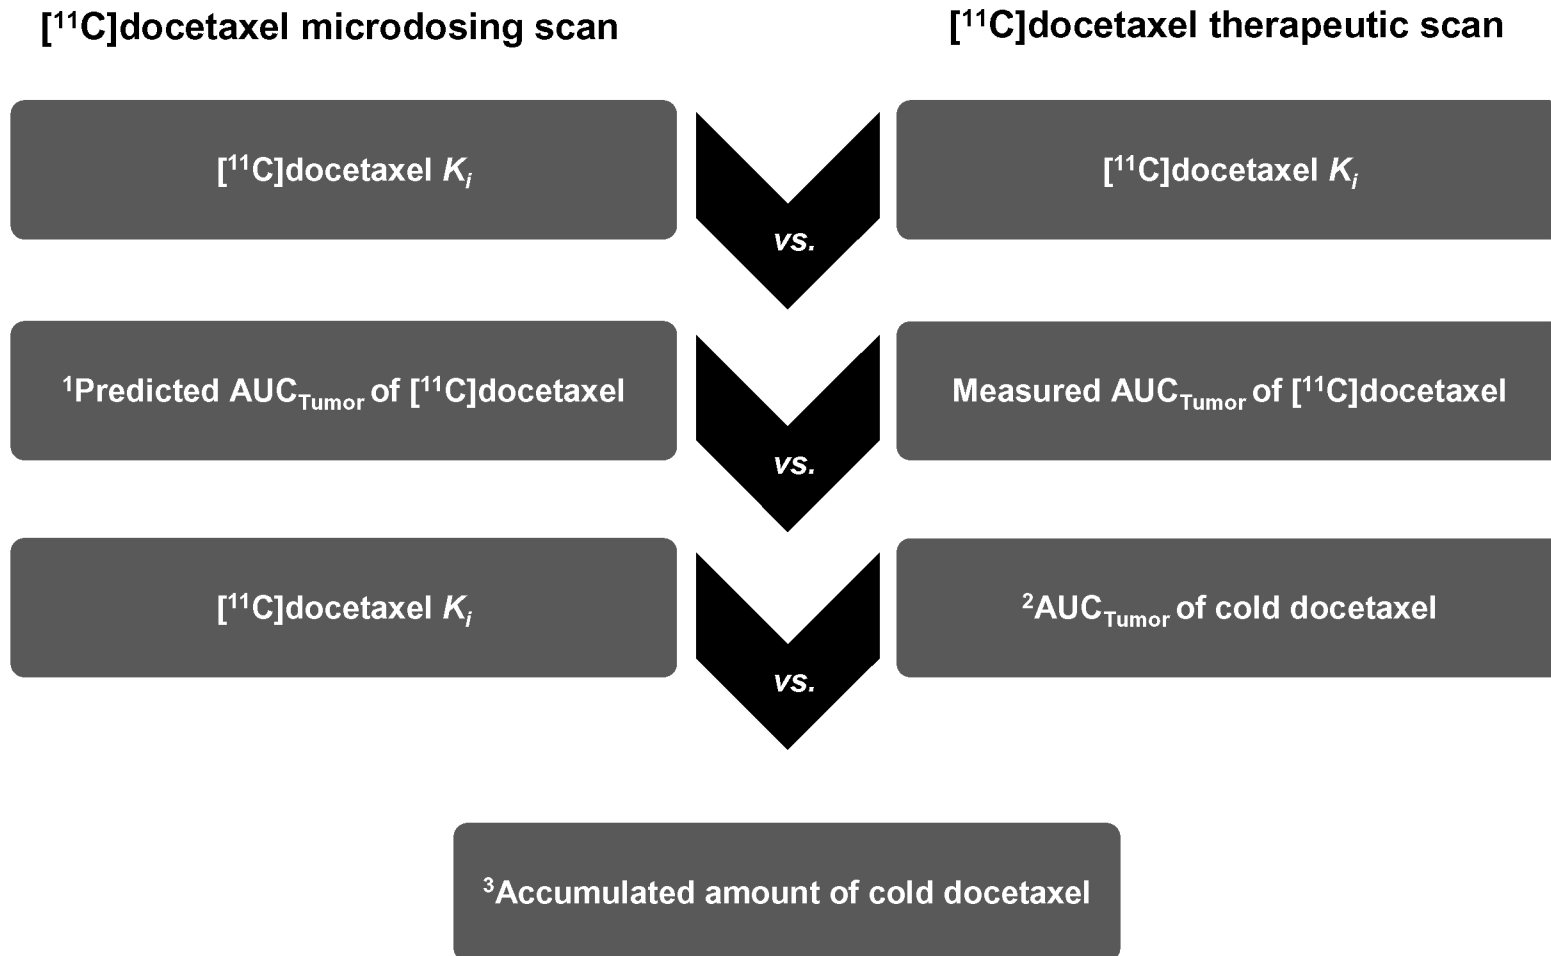

Supplement: Supplementary file 1 [file 39899486]
